# Supplementary material
Source: ML conference proceedings conference paper supplement (https://openaccess.thecvf.com/content/WACV_2020/html/Heljakka_Towards_Photographic_Image_WACV_2020_paper.html)
Supplement: Supplementary file 1 [file Heljakka_Towards_Photographic_Image_WACV_2020_supplemental.pdf]

Archive with 2 entries (2 files):
- supplement.pdf
- supplement.mp4
