# Supplementary material
Source: ML conference proceedings conference paper supplement (https://openaccess.thecvf.com/content/WACV_2020/html/Heljakka_Towards_Photographic_Image_WACV_2020_paper.html)
Supplement: Supplementary file 1 [file Heljakka_Towards_Photographic_Image_WACV_2020_supplemental.pdf › supplement.pdf]

# Supplementary material for Towards Photographic Image Manipulation with Balanced Growing of Generative Autoencoders

## A. Training details

The architecture follows [13], so that the encoder and the decoder are symmetric, composed of residual blocks with two convolutional layer each, and  $1\times 1$  convolution for a skip connection. The final layer of the encoder contains a  $4\times 4$  filter that reduces the feature map into 512 channels on a  $1\times 1$  map that, flattened, represents the latent vector. Other filters are  $3\times 3$ . At each forward pass, the latent vector is normalized to unit length. Each block in the encoder halves the resolution of the input with stride equalling two, while each block of the decoder doubles it by upsampling and then running a convolution with stride equal to one.

The training proceeds via seven resolution phases, from  $4\times 4$  to  $256\times 256$ . During the first half of each phase, the skip connection of the most recently added residual block is gradually faded out. During the second half, the skip connection is off. During each phase up to  $32\times 32$ , the network sees a total of 2.4M image samples. The batch size generally halves for each consecutive phase to fit in GPU memory, with size 16 used for the final  $256\times 256$  stage. The pre-training phases  $64\times 64$  and  $128\times 128$  contained 3.5–6.2M samples so that the total sample count seen during pre-training for Balanced PIONEER (20.04M in CELEBA-HQ, 21.4M in LSUN) was below the total for baseline PIONEER. Two consecutive decoder training iterations were used for every single encoder training iteration.

Margin values in range  $[0.2, 0.6]$  were tried. We switched on the margins after 13M training samples (*i.e.* after the fade-in phase and the first full-length epoch of  $64\times 64$  phase). For the balanced PIONEER, the results with the best FID reached for  $256\times 256$  resolution after seeing 27.3M training image samples were selected. This limit was chosen as it was the point around which the baseline PIONEER reached best FID (10k) values for LSUN Bedrooms, slightly earlier than its best value for CELEBA-HQ (at 27.5M). Applying lower margin values, or even a margin of 0.2 before  $64\times 64$  resolution stage, resulted in obvious training failure already by the end of the  $64\times 64$  stage. At the other extreme, applying very high margin values would nullify the effect of the margin.

Following [13, 19], we maintain a moving exponential running average for the weights of the generator, and use

it as the de facto generator after the training. Any other hyper-parameters follow [13]. Accordingly, every residual block in both the encoder and the decoder ends with a LeakyReLU (slope 0.2) activation function. However, at the final layer that maps into the latent vector, this activation in fact skews the distribution slightly away from the unit Gaussian, thus making the learning task harder. In follow-up works, we therefore strongly recommend removing the non-linearity of the last layer. We optimize with ADAM [24] ( $\alpha = 0.001$ ,  $\beta_1 = 0$ ,  $\beta_2 = 0.99$ , and  $\varepsilon = 10^{-8}$ ).

## B. Ablation study details

The comparisons in Fig. 3b were created by training the model with PN, PN+EQLR *etc.* in CELEBA-HQ up to 20M steps. The schedule for resolution increases and other hyper-parameters except the normalization are the same as for the main experiments that produced the results reported for Balanced PIONEER in the paper. For the experiments that involve the use of margin, we likewise follow the same schedule of margins as the main experiments. Finally, we tried removing all normalizations, and reproduced the negative results of [13]—the training simply fails to converge already before reaching  $64\times 64$  resolution. We also collect the FID results at 20M training steps for each method in the ablation study (Table 2).

In addition, we modified the original PGGAN by replacing PN and EQLR in the generator with SN, and trained with CELEBA-HQ in  $128\times 128$  up to 15,000,000 seen image samples. The best FID (measured with 10k training samples, 2 test runs) results were approximately the same (with PN+EQLR 12.44 and with SN 12.65). Note that here, there is no term corresponding to the KL margin.

## C. Feature manipulation

Following the method in Sec. 3.4, we take the same CELEBA-HQ model that was trained in a completely unsupervised manner, and apply the feature vectors from the latent space as in Fig. 6, but this time showing how each feature transforms the (reconstruction of the) input image gradually as a function of  $\lambda$  (Fig. 7). We also provide more examples of the features in Fig. 6 applied to other images, and other features

Table 2. Comparison of Fréchet Inception Distance (FID) with various normalization schemes, after training with the first 20M samples in CELEBA-HQ. The final FID (20M) and the best FID reached are shown. Note that some results could significantly improve with more training. 10,000 samples were used for FID, compared against the training set. Value for SN (without margin) is not given because the training consistently collapses when reaching  $128 \times 128$ . For all numbers, **smaller is better**.

| Method           | FID-10k (20M) | FID-10k (best) |
|------------------|---------------|----------------|
| PN               | 165.81        | 129.60         |
| PN+margin        | 223.90        | 117.00         |
| EQLR             | 181.22        | 162.99         |
| EQLR+margin      | 183.53        | 128.97         |
| EQLR+PN          | 151.94        | 140.60         |
| EQLR+PN+margin   | 223.43        | 127.65         |
| SN               | —             | —              |
| SN+margin (ours) | <b>22.20</b>  | <b>22.20</b>   |

computed with the same method, and their combinations (Fig. 8).

## D. Latent space interpolations

We show 4-way interpolation examples for uncured CELEBA-HQ test set images, following the same method as used for Fig. 1, but with evenly spaced (spherical) interpolation between the reconstructions of each of the input images in the corners (Fig. 10–12). Fig. 11 represents a failure case.

## E. Random samples

We show more random generated samples for CELEBA-HQ using Balanced PIONEER (ours) (Fig. 13), the baseline PIONEER (Fig. 14), GLOW (Fig. 15) and PGGAN (Fig. 16). Similarly, we show more random samples for LSUN using Balanced PIONEER (ours) (Fig. 17) and the baseline PIONEER (Fig. 18).

## F. Reconstructions

We show more uncured examples of CELEBA-HQ reconstructions, comparing Balanced PIONEER (ours) against the baseline PIONEER (Fig. 19–20).

## G. Feature transformation videos

The attached video demonstrates various gradual feature transformations (as in Fig. 7). Each transformation shows  $\lambda$  varying on a subrange of  $[-2.0, 2.0]$ , applied on the original test set images shown in Fig. 21.

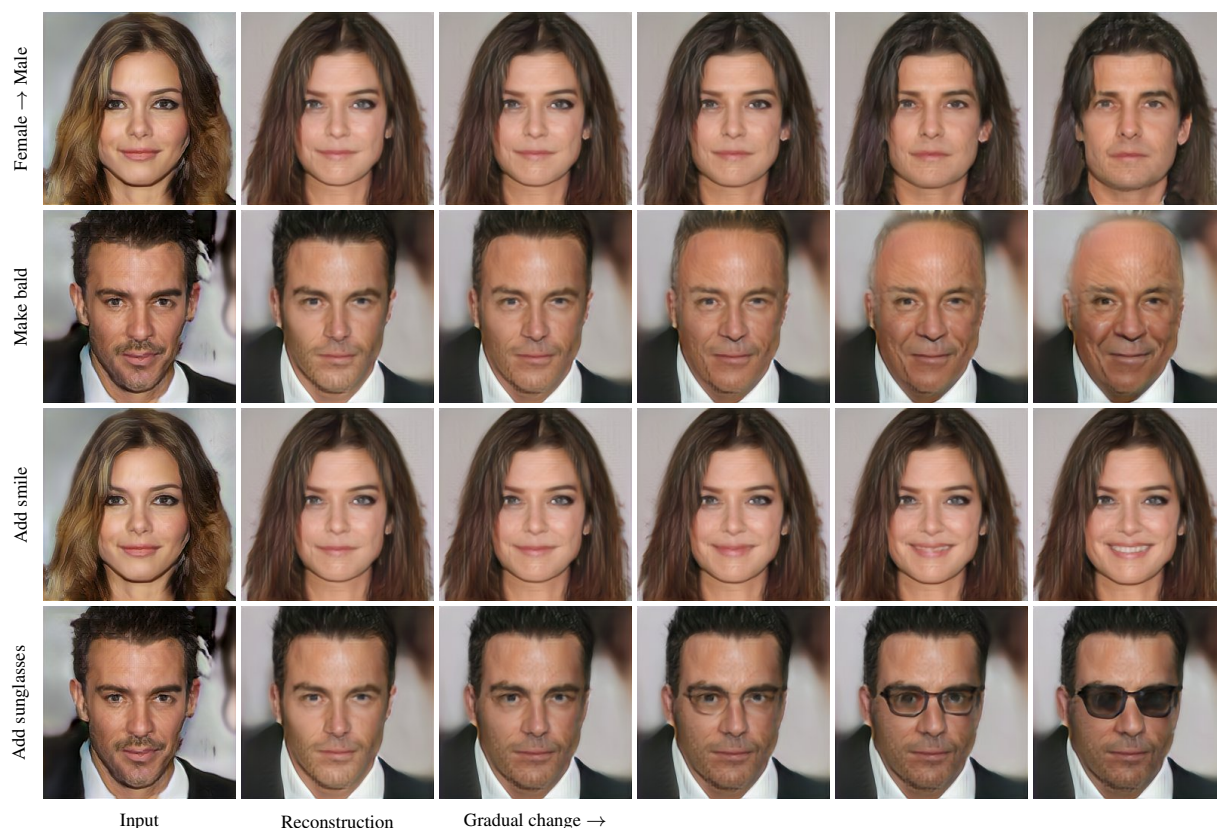

Figure 7. Balanced PIONEER gradual feature manipulation (CELEBA-HQ) at  $256 \times 256$  resolution by increasing  $\lambda$  for a single feature. Column 1: Input; Column 2: Reconstruction ( $\lambda = 0$ ); Columns 3–6:  $\lambda$  increasing. Row 1: Female  $\rightarrow$  Male; Row 2: Make bald; Row 3: Add smile; Row 4: Add sunglasses.

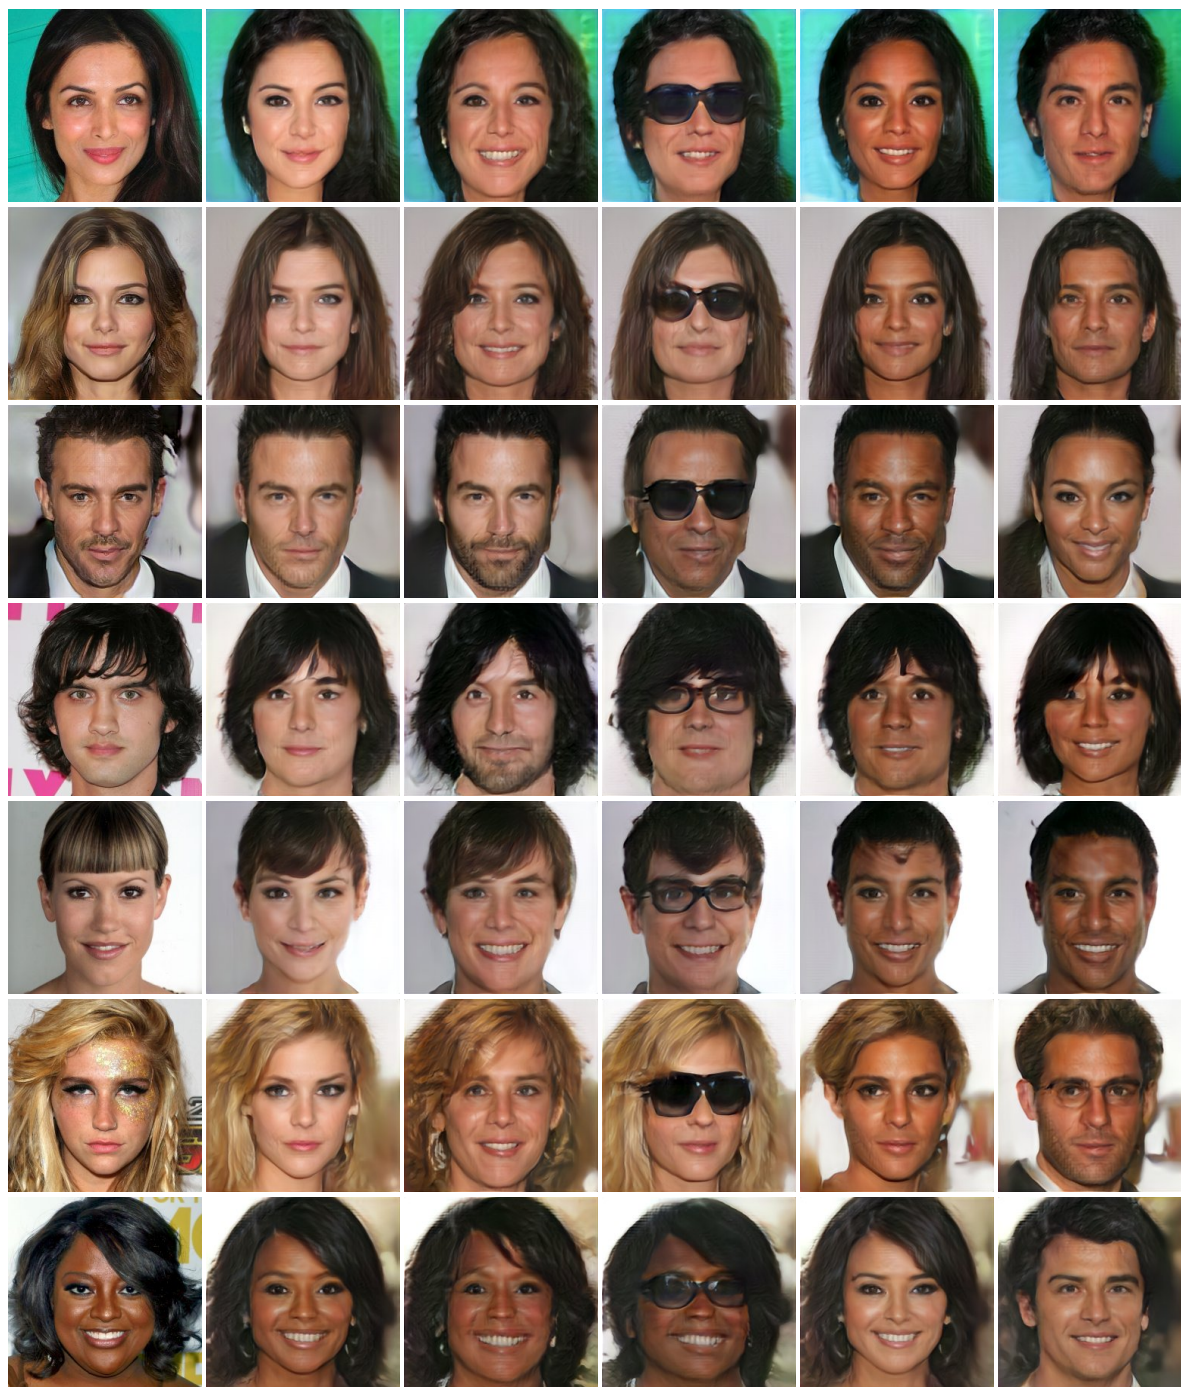

Figure 8. Balanced PIONEER discrete feature manipulation (CELEBA-HQ) at  $256 \times 256$  resolution by adding various feature vectors. Column 1: Input; Column 2: Reconstruction ( $\lambda = 0$ ); Column 3: Make older (females) or Add beard (males); Column 4: Make older + Add (sun)glasses; Column 5: Darken/whiten the skin; Column 6: Switch sex + Darken/whiten the skin.

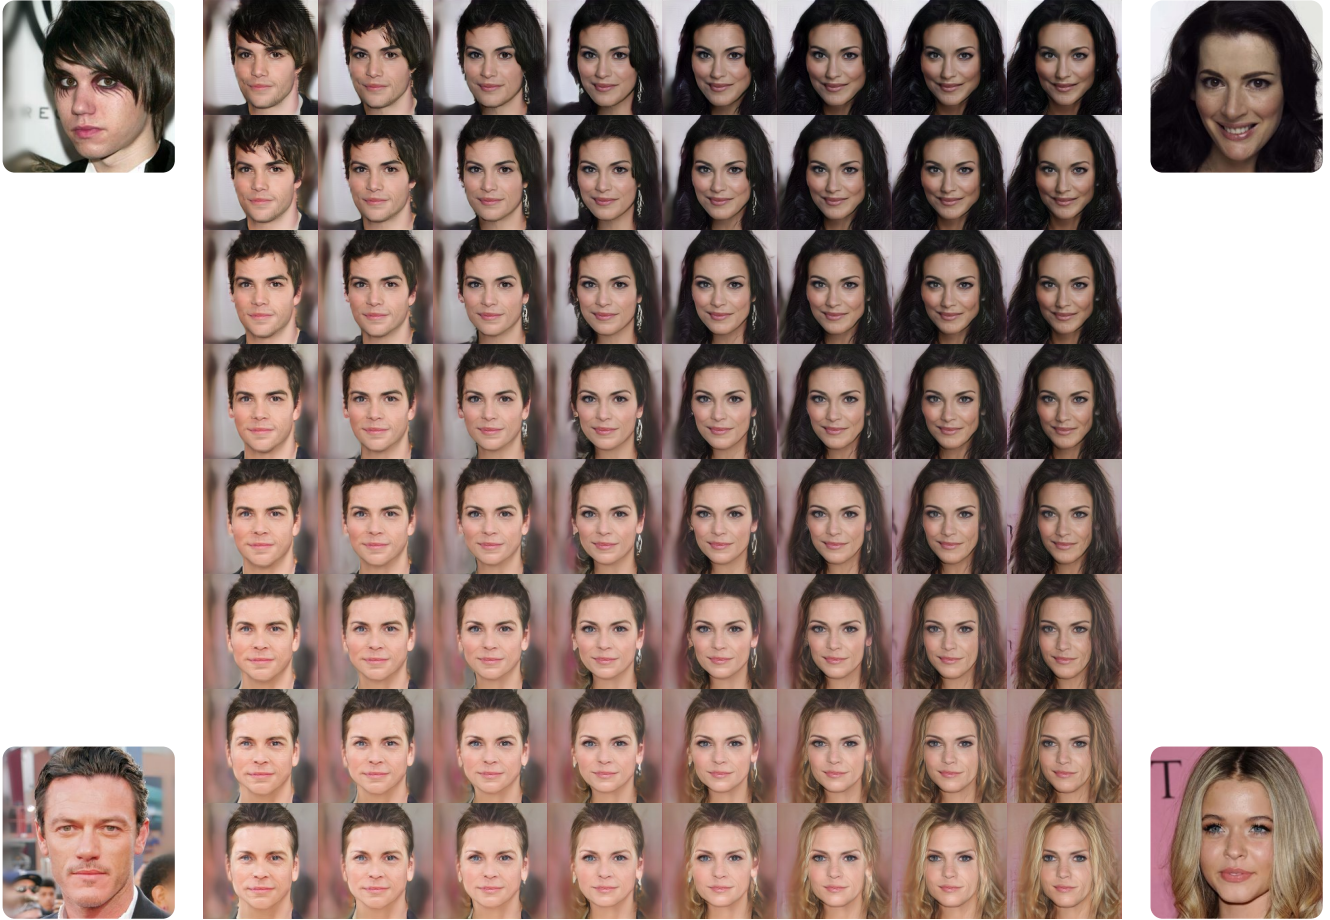

Figure 9. Interpolation between random uncensored test set CELEBA-HQ images in  $256 \times 256$ . The model captures most of the salient features, although fails with some details such as the unusual make-up of the top-left person. Note that the moderate rotation angles of the faces are almost perfectly preserved, and the intermediate faces are rotated to the correct degree.

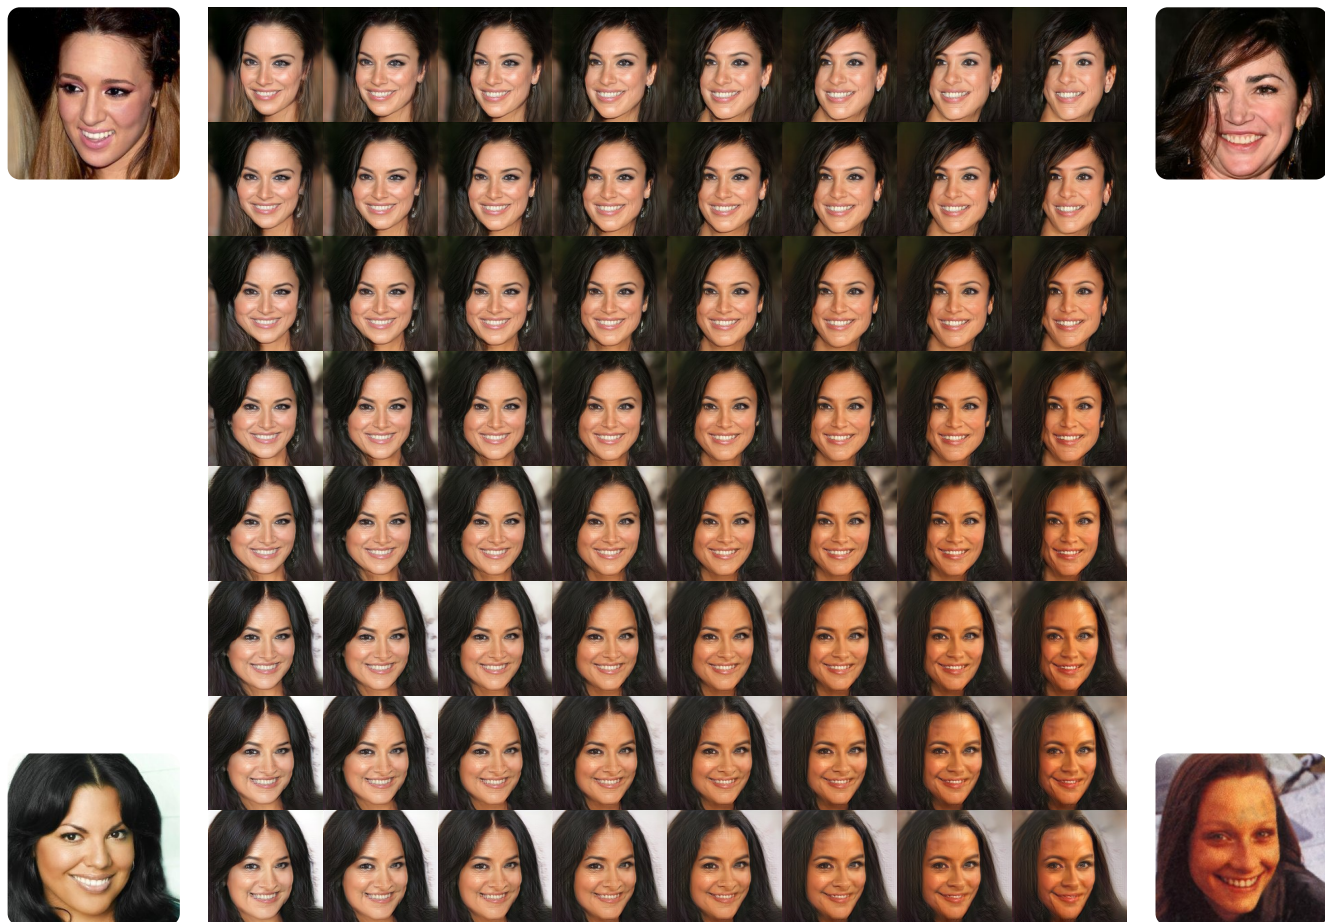

Figure 10. Interpolation between random uncured test set CELEBA-HQ images in  $256 \times 256$ .

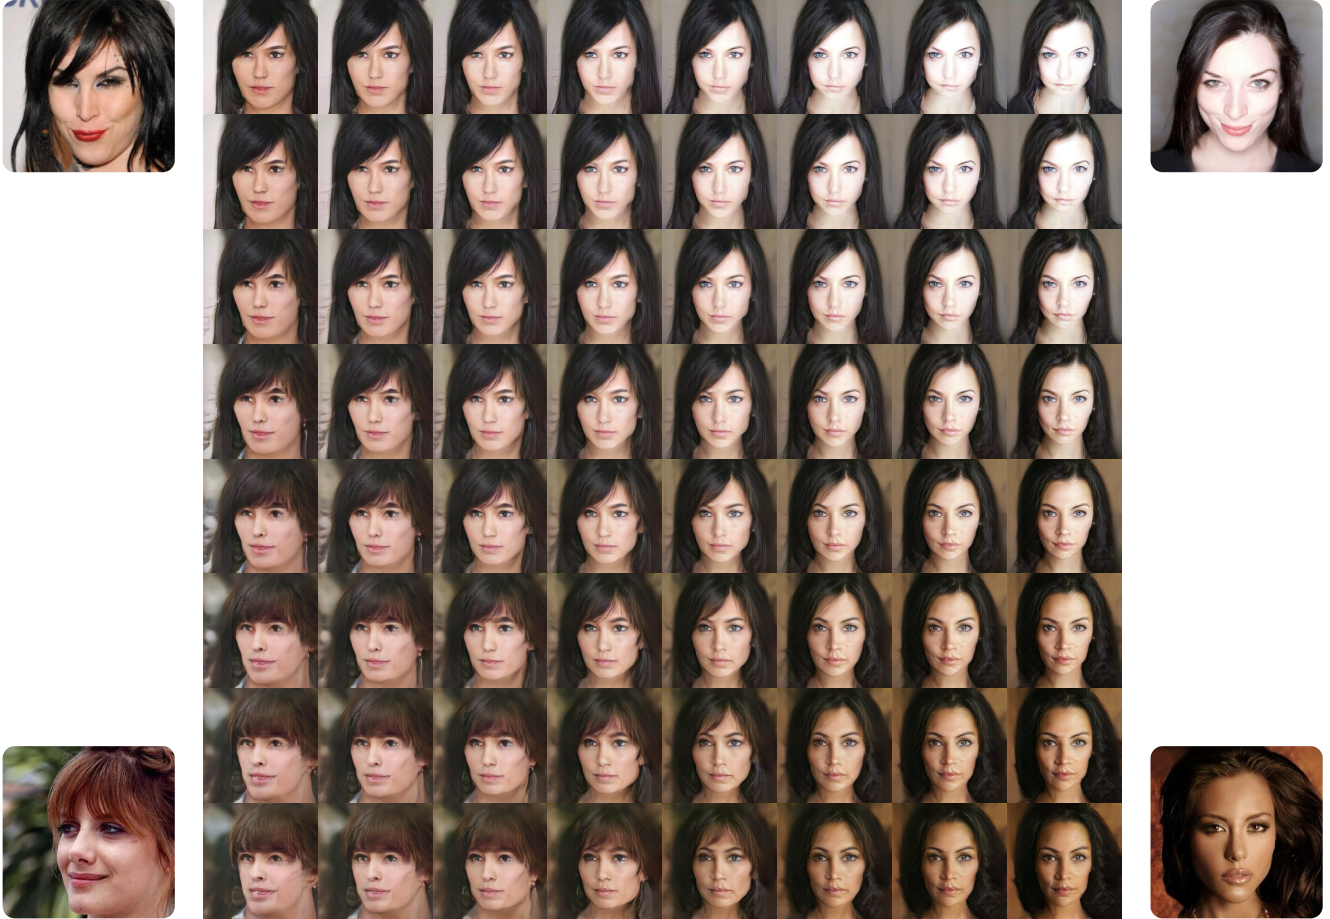

Figure 11. Interpolation between random uncured test set CELEBA-HQ images in  $256 \times 256$ . Bottom-left image reconstruction is clearly inadequate.

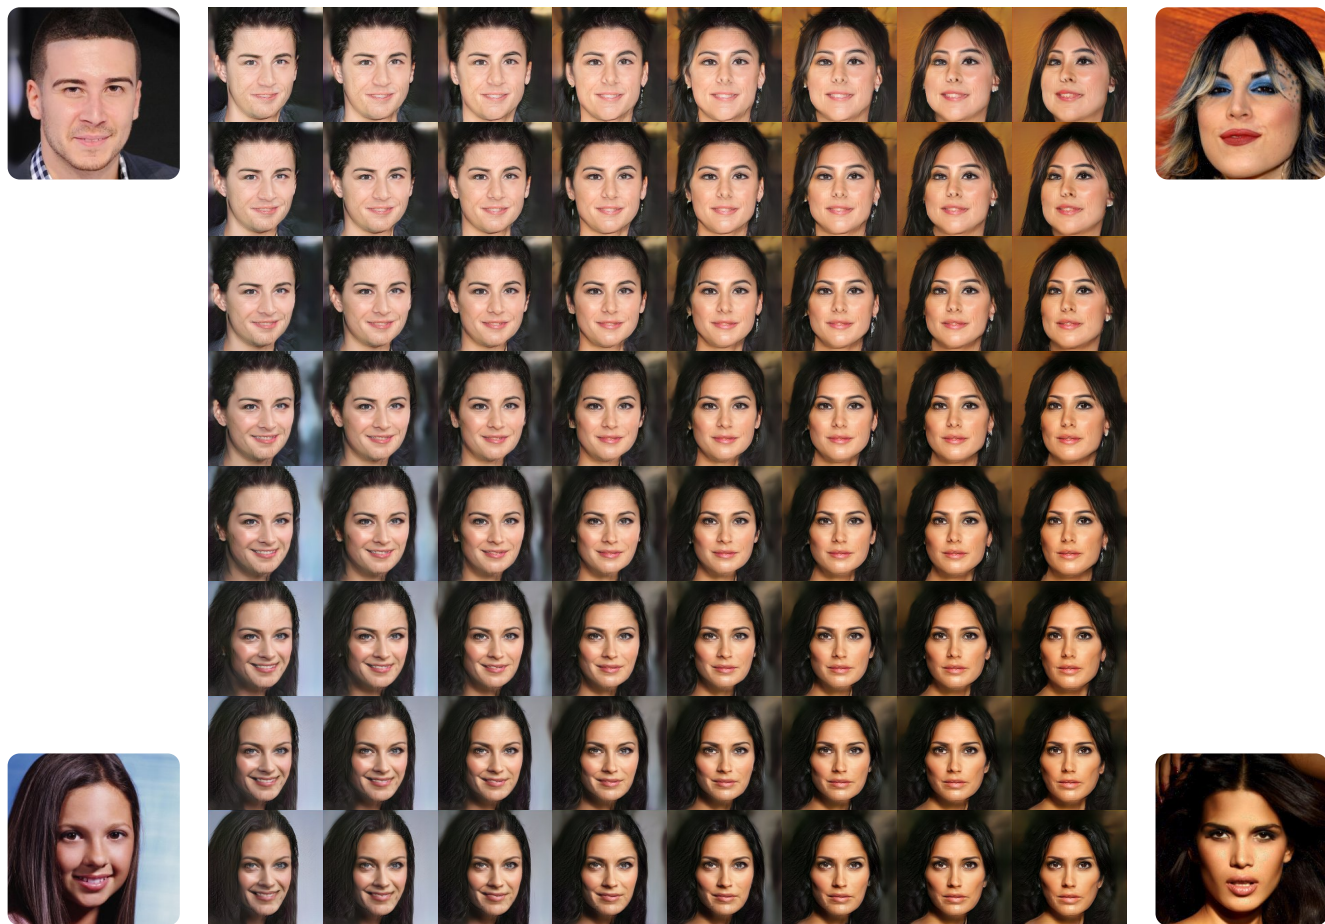

Figure 12. Interpolation between random uncensored test set CELEBA-HQ images in  $256 \times 256$ .

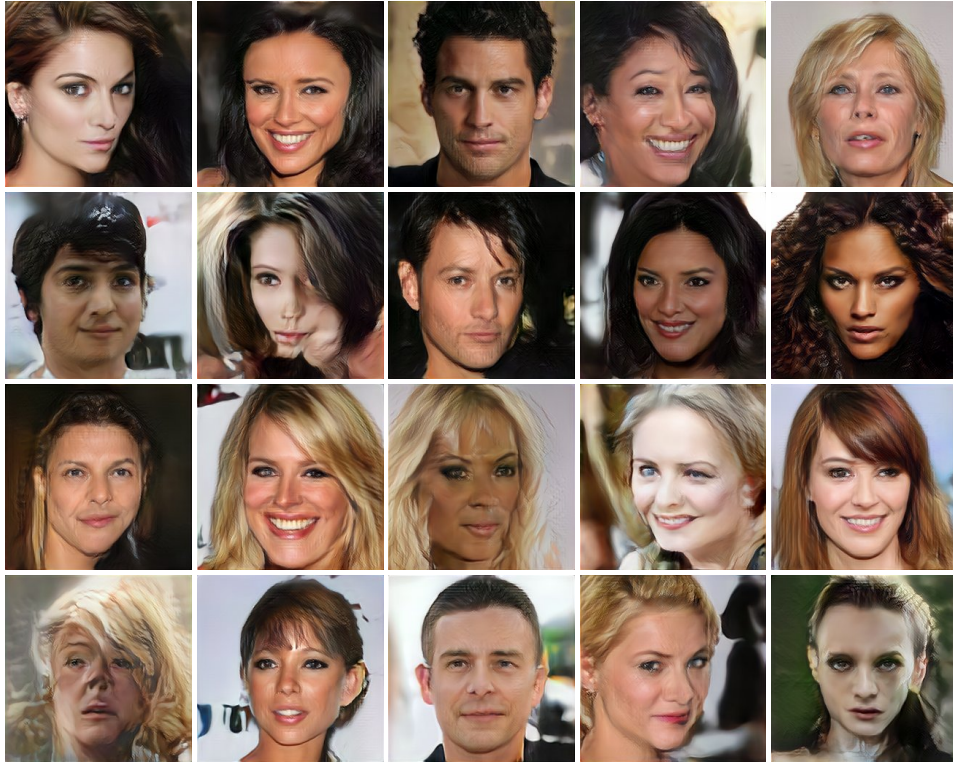

Figure 13. Balanced PIONEER (ours) random samples (CELEBA-HQ) at  $256 \times 256$  resolution.

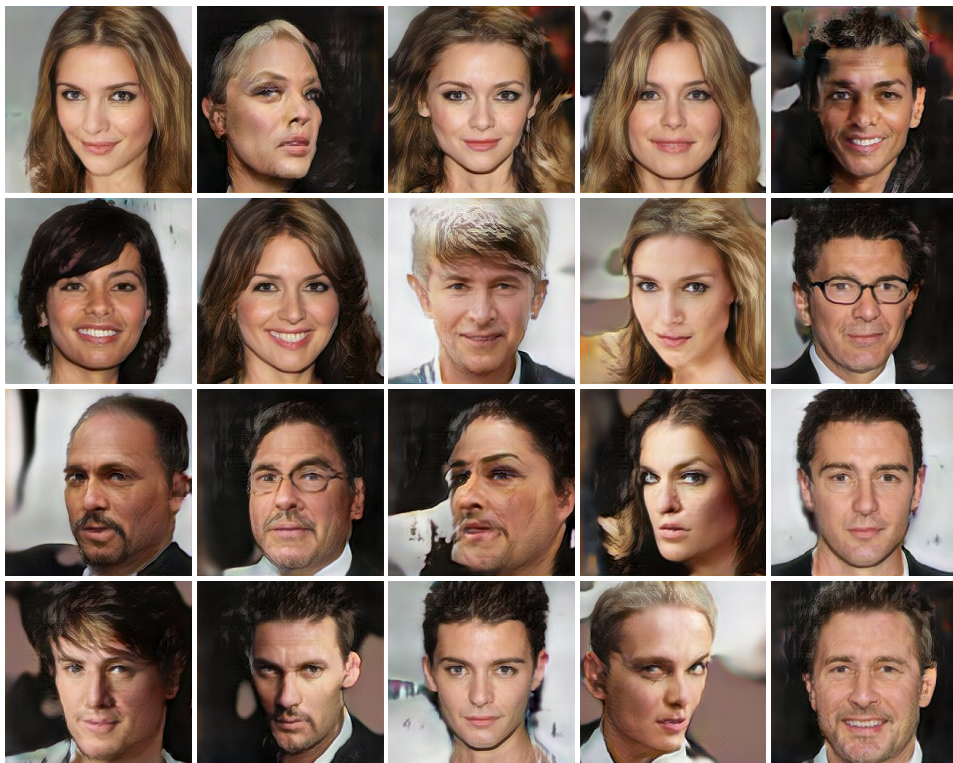

Figure 14. Baseline PIONEER random samples (CELEBA-HQ) at  $256 \times 256$  resolution.

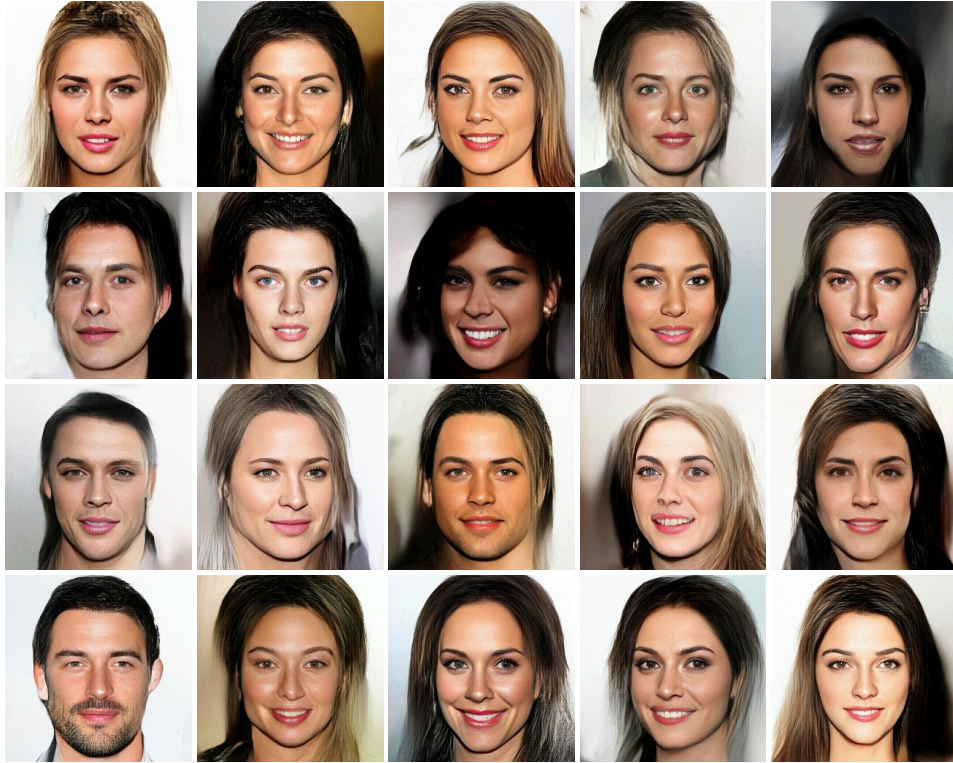

Figure 15. GLOW random samples (CELEBA-HQ) at  $256 \times 256$  resolution, temperature  $T = 0.7$ .

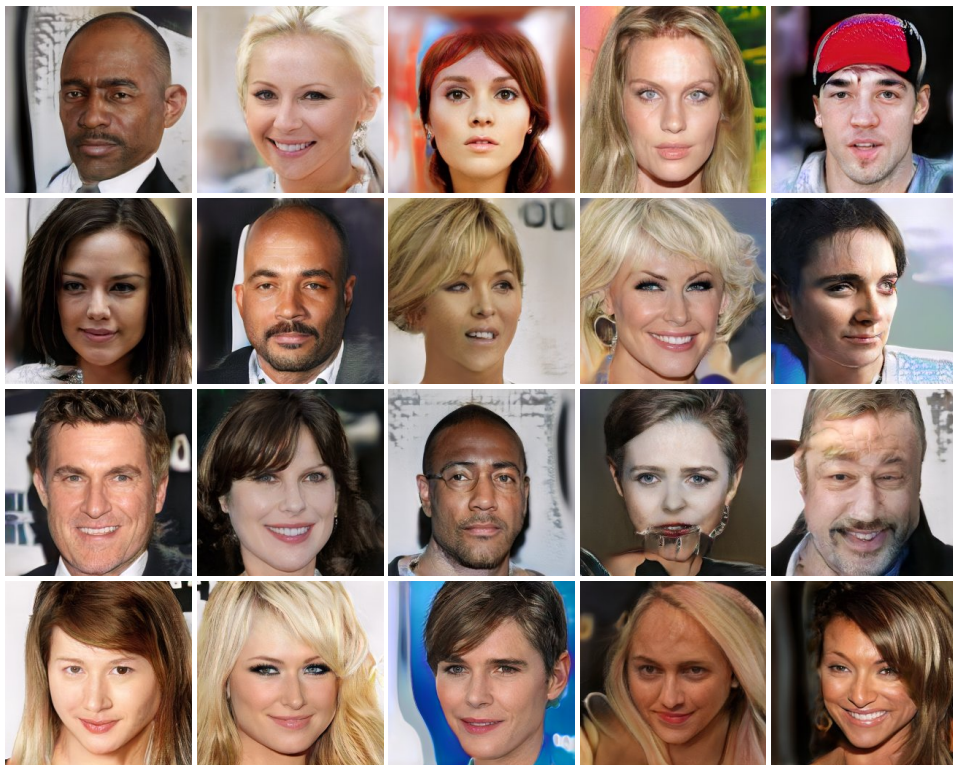

Figure 16. Progressively Growing GAN (PGGAN) random samples (CELEBA-HQ) at  $256 \times 256$  resolution.

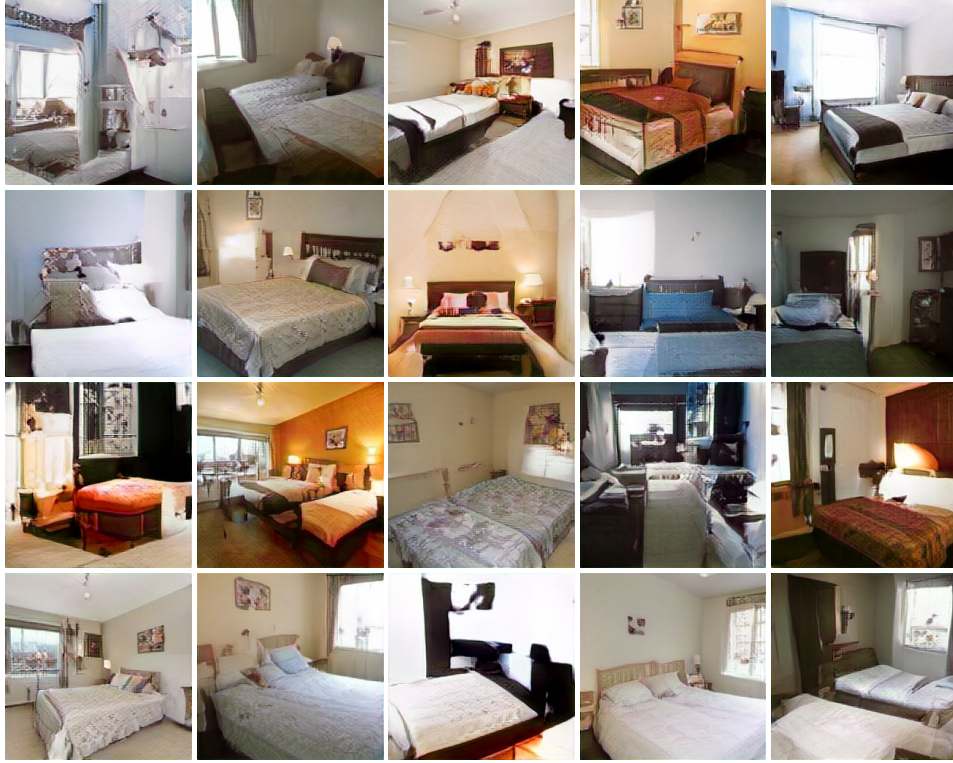

Figure 17. Balanced PIONEER (ours) random samples (LSUN Bedrooms) at  $256 \times 256$  resolution.

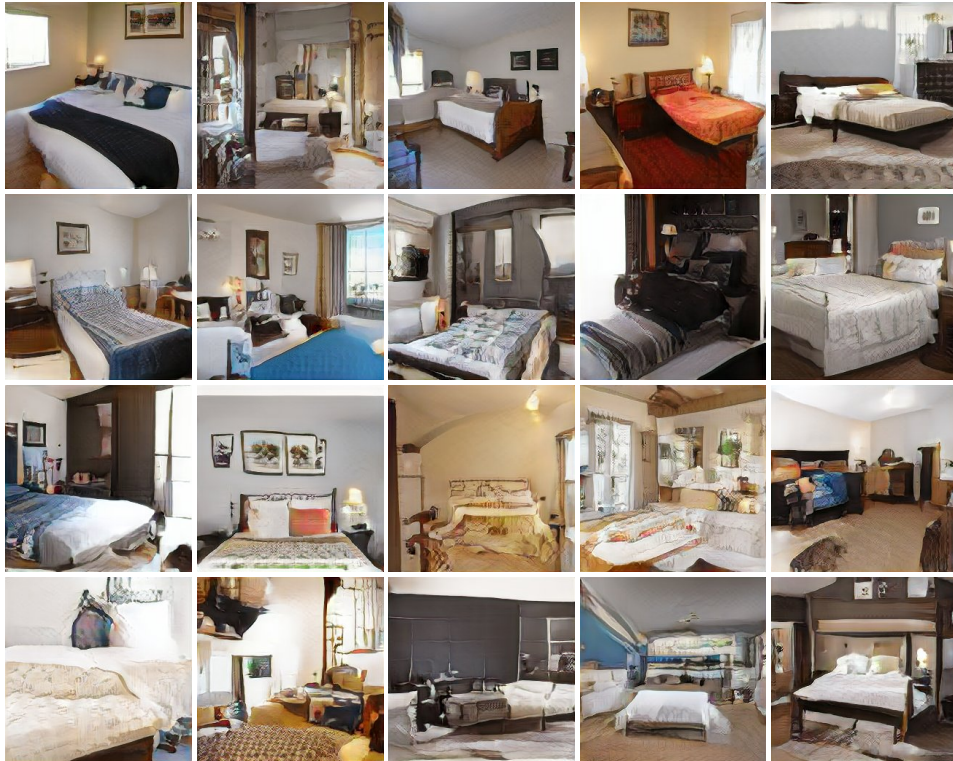

Figure 18. Baseline PIONEER random samples (LSUN Bedrooms) at  $256 \times 256$  resolution.

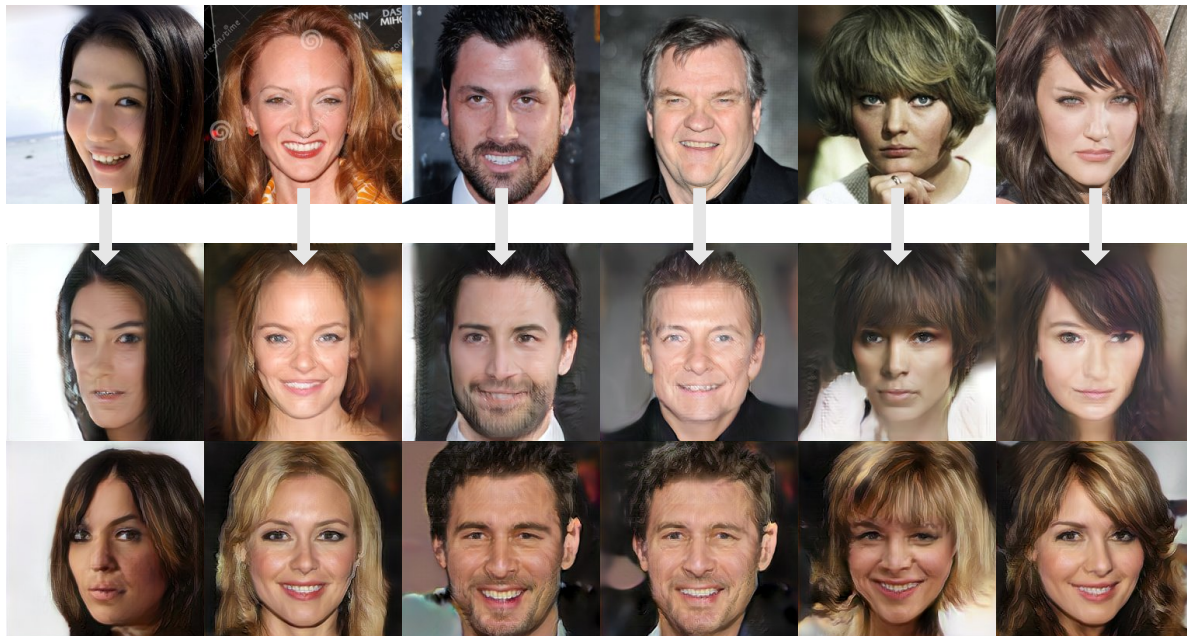

Figure 19. More examples of reconstruction quality in  $256 \times 256$  resolution with typical images from the CELEBA-HQ test set (top row), by our balanced PIONEER (middle) and baseline PIONEER (bottom). Here, the input images are encoded into 512-dimensional latent feature vector and decoded back to the original dimensionality (middle and bottom rows). The encoding-decoding of balanced PIONEER tends to preserve facial features, orientation, expressions, and hair style. Small mistakes can still be observed, especially in male subjects.

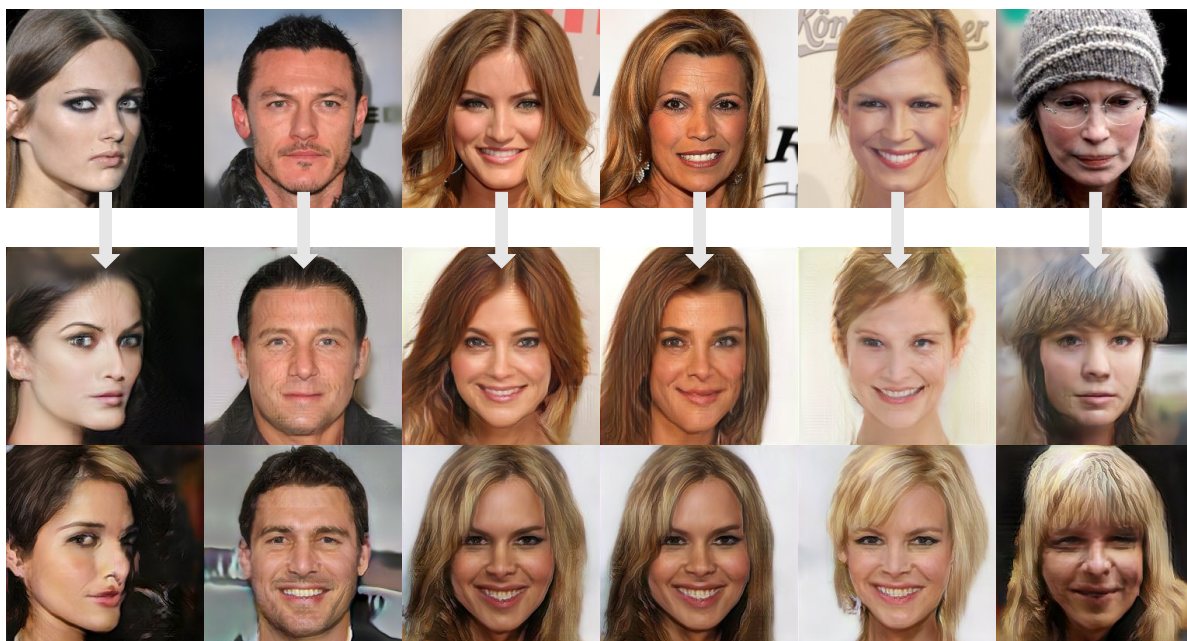

Figure 20. More examples of reconstruction quality in  $256 \times 256$  resolution with typical images from the CELEBA-HQ test set (top row), by our balanced PIONEER (middle) and baseline PIONEER (bottom). Here, the input images are encoded into 512-dimensional latent feature vector and decoded back to the original dimensionality (middle and bottom rows). The encoding-decoding of balanced PIONEER tends to preserve facial features, orientation, expressions, and hair style. Small mistakes can still be observed, especially in male subjects.

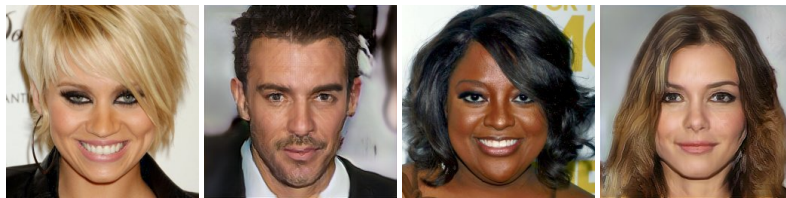

Figure 21. CELEBA-HQ test set images used as input for the image transformation videos.
